# Supplementary material for: Variation in stable carbon and oxygen isotopes of individual benthic foraminifera: tracers for quantifying the magnitude of isotopic disequilibrium
Source: Copernicus journal article supplement (doi:10.5194/bg-9-4353-2012), 2012-11-08
Supplement: Supplementary file 1 [file 20121103-Ishimura-Supplement-Caption.pdf › 20121103-Ishimura-Supplement-Caption.pdf]

Supplementary Fig. 1 (movie file):

5     Animated three-dimensional plot of the relationship between  $\Delta\delta^{13}\text{C}$ ,  $\Delta\delta^{18}\text{O}$ , and shell weight.
